# Supplementary material
Source: PubMed Central journal article supplement (PMC3553917)
Supplement: JCM.02285-12_zjm999092258so1.pdf [file JCM.02285-12_zjm999092258so1.pdf]

[illegible]















[illegible]













































[illegible]
